# Supplementary material for: Structure solution of a novel aluminium methylphosphonate using a new simulated annealing program and powder X-ray diffraction data
Source: Royal Society of Chemistry journal article supplement (doi:10.1039/b200318j), 2002-03-14
Supplement: b200318j1.doc [file b200318j1.doc]

Supplementary Material (ESI) for Chemical Communications

This journal is © The Royal Society of Chemistry 2002

Lattice constants are:

*a* = 13.2820(33)Å *b* = 9.6433(23)Å *c* = 5.0660(13) Å

 = 89.601(4)°  = 111.2378(34)°  = 92.0838(34) °

Cell volume = 604.39(26) Å3

| Name | X | Y | Z | Ui/Ue*100 |
| --- | --- | --- | --- | --- |
| P1a | .9744(9) | .837(1) | .255(2) | 1.9(2) |
| O1a | .891(2) | .894(2) | .021(4) | 2.8(3) |
| C1a | .966(2) | .648(2) | .186(5) | 2.8(3) |
| O2a | 1.091(2) | .898(2) | .326(4) | 2.8(3) |
| O3a | .939(2) | .834(2) | .523(4) | 2.8(3) |
| P1b | .3455(8) | .312(1) | .580(2) | 1.9(2) |
| C1b | .356(2) | .493(2) | .513(5) | 2.8(3) |
| O1b | .438(2) | .259(2) | .486(4) | 2.8(3) |
| O2b | .391(2) | .297(2) | .922(4) | 2.8(3) |
| O3b | .242(2) | .250(2) | .434(5) | 2.8(3) |
| P1c | .3399(9) | .905(1) | .853 (2) | 1.9(2) |
| C1c | .260(2) | .787(2) | .958(6) | 2.8(3) |
| O1c | .288(2) | .984(2) | .596(4) | 2.8(3) |
| O2c | .382(2) | 1.007(2) | 1.064(4) | 2.8(3) |
| O3c | .411(1) | .813(2) | .732(4) | 2.8(3) |
| Al1 | .4446(9) | .165(1) | .150(3) | 1.9(2) |
| Al2 | .1645(9) | .071(1) | .381(3) | 1.9(2) |
| Ha1 | .93(1) | .639(3) | -.044(6) | 2.50 |
| Ha2 | 1.049(4) | .615(4) | .28(3) | 2.50 |
| Ha3 | .91(1) | .607(3) | .28(3) | 2.50 |
| Hb1 | .438(3) | .519(3) | .53(2) | 2.50 |
| Hb2 | .298(6) | .515(3) | .301(8) | 2.50 |
| Hb3 | .338(8) | .551(2) | .68(1) | 2.50 |
| Hc1 | .223(9) | .707(9) | .80(2) | 2.50 |
| Hc2 | .198(8) | .838(4) | 1.01(3) | 2.50 |
| Hc3 | .308(4) | .73 (1) | 1.15(2) | 2.50 |

| Bonds | Length (Å) |  | Bonds | Length (Å) |
| --- | --- | --- | --- | --- |
| P1a_O1a | 1.42(2) |  | O1c_Al2 | 1.83(2) |
| P1a_O2a | 1.55(2) |  | O1a_Al2 | 1.93(2) |
| P1a_O3a | 1.59(2) |  | O2a_Al2 | 1.87(2) |
|  |  |  | O3a_Al2 | 1.88(2) |
| P1b_O1b | 1.58(2) |  | O3b_Al2 | 1.94(2) |
| P1b_O2b | 1.62(2) |  |  |  |
| P1b_O3b | 1.42(2) |  | O1b_Al1 | 1.96(2) |
|  |  |  | O2b_Al1 | 1.71(2) |
| P1c_O1c | 1.46(2) |  | O2c_Al1 | 1.70(2) |
| P1c_O2c | 1.40(2) |  | O3c_Al1 | 1.79(2) |
| P1c_O3c | 1.60(2) |  |  |  |
|  |  |  | P1a_C1a | 1.85(2) |
| C1a_Ha1 | 1.09(3) |  | P1b_C1b | 1.79(2) |
| C1a_Ha2 | 1.09(3) |  | P1c_C1c | 1.74(2) |
| C1a_Ha3 | 1.09(3) |  |  |  |
| C1b_Hb1 | 1.09(3) |  |  |  |
| C1b_Hb2 | 1.09(3) |  |  |  |
| C1b_Hb3 | 1.09(3) |  |  |  |
| C1c_Hc1 | 1.09(3) |  |  |  |
| C1c_Hc2 | 1.09(3) |  |  |  |
| C1c_Hc3 | 1.09(3) |  |  |  |

| Angle | Degrees (°) |  | Angle | Degrees(°) |
| --- | --- | --- | --- | --- |
| O1b_Al2_O2c | 180(1) |  | C1a_P1a_O1a | 106(2) |
| O1b_Al2_O1a | 92(1) |  | C1a_P1a_O2a | 112(1) |
| O1b_Al2_O3a | 88(1) |  | C1b_P1b_O1b | 100(1) |
| O1b_Al2_O1c | 96(1) |  | C1b_P1b_O2b | 107(1) |
| O1a_Al2_O3a | 130(1) |  | C1c_P1c_O1c | 118(1) |
| O1a_Al2_O1c | 98 (1) |  | C1c_P1c_O2c | 109(1) |
| O1a_Al2_O2c | 88(1) |  |  |  |
| O3a_Al2_O1C | 131(1) |  | O3b_Al1_O2b | 116(1) |
| O3a_Al2_O2c | 92(1) |  | O3b_Al1_O3c | 121(1) |
| O1c_Al2_O2c | 84(1) |  | O3b_Al1_O2a | 117(1) |
|  |  |  | O2b_Al1_O3c | 108(1) |
|  |  |  | O2b_Al1_O2a | 967(1) |
|  |  |  | O3c_Al1_O2a | 94(1) |
