# Supplementary material for: Structure solution of a novel aluminium methylphosphonate using a new simulated annealing program and powder X-ray diffraction data
Source: Royal Society of Chemistry journal article supplement (doi:10.1039/b200318j), 2002-03-14
Supplement: b200318j4.doc [file b200318j4.doc]

Supplementary Material (ESI) for Chemical Communications

This journal is © The Royal Society of Chemistry 2002
