# Supplementary figures and images for: Structure solution of a novel aluminium methylphosphonate using a new simulated annealing program and powder X-ray diffraction data
Source: Royal Society of Chemistry journal article supplement (doi:10.1039/b200318j), 2002-03-14

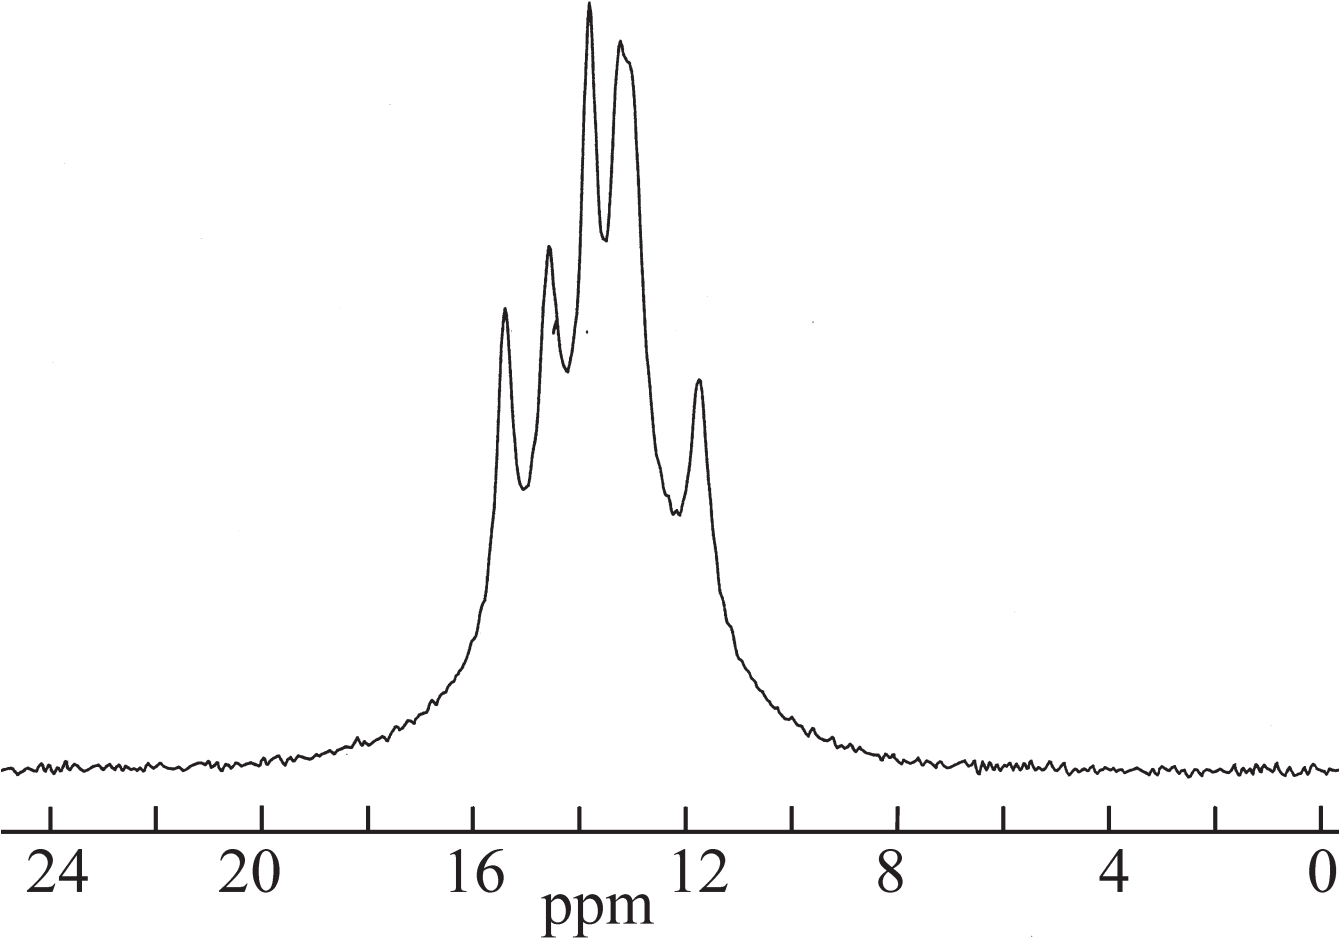

Supplement: b200318j2.pdf [file b200318j2.pdf]

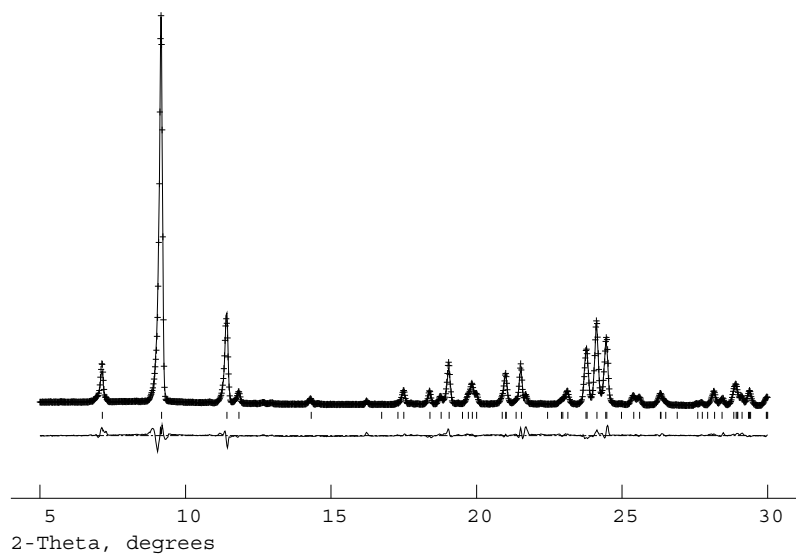

Supplement: b200318j6.pdf [file b200318j6.pdf]

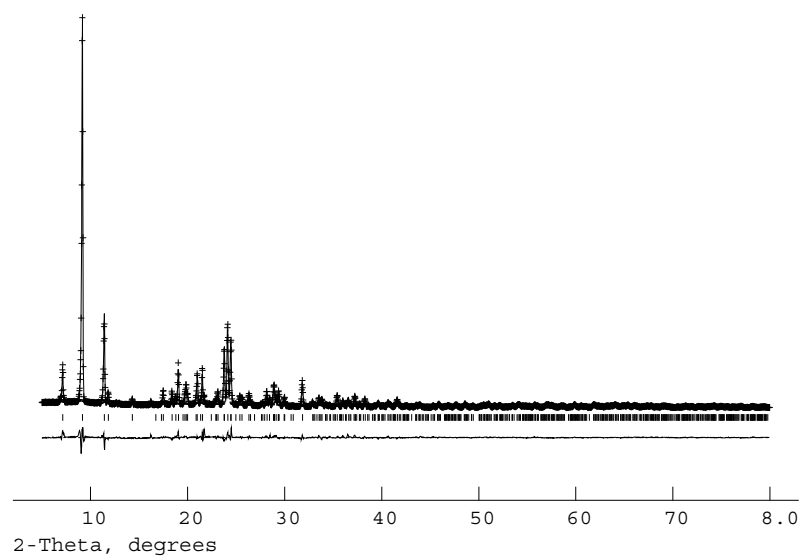

Supplement: b200318j7.pdf [file b200318j7.pdf]

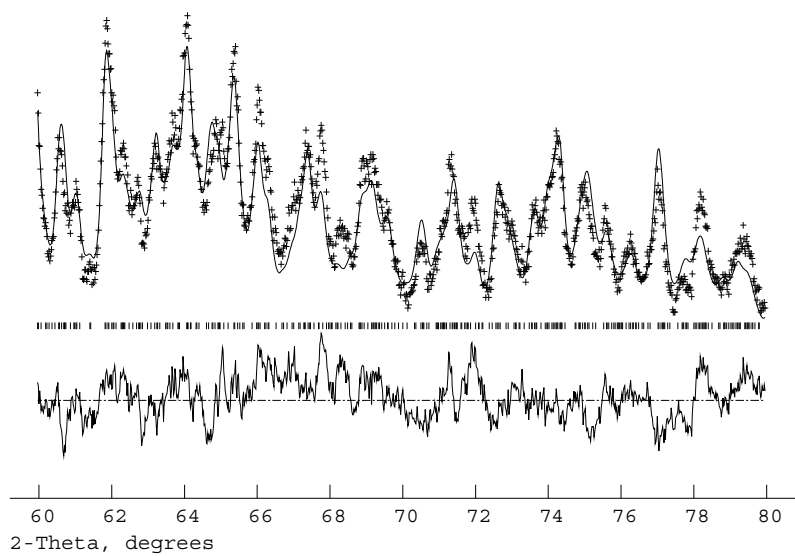

Supplement: b200318j8.pdf [file b200318j8.pdf]
